# Supplementary material for: A Virus Hosted in Malaria-Infected Blood Protects against T Cell-Mediated Inflammatory Diseases by Impairing DC Function in a Type I IFN-Dependent Manner
Source: PubMed Central journal article supplement (PMC7157782; doi:10.1128/mbio.03394-19), 2020-04-07

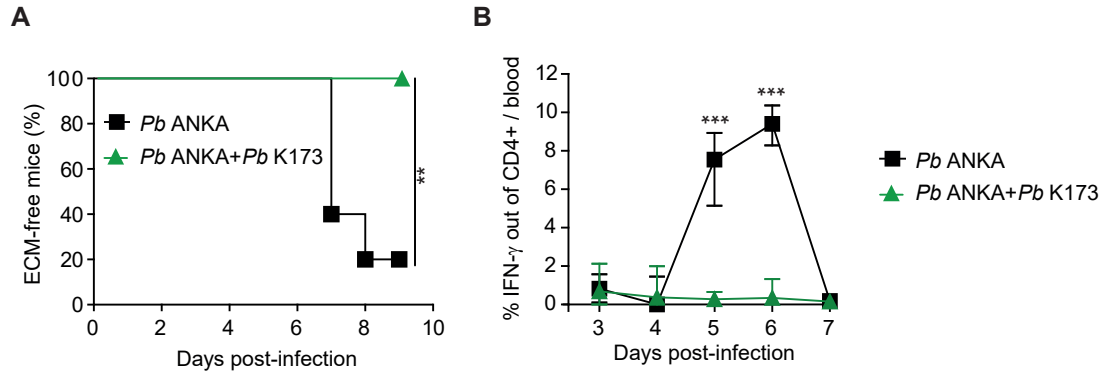

Supplement: mBio.03394-19-sf001.pdf [file mBio.03394-19-sf001.pdf]
